# Supplementary material for: Solvation and diffusion of poly(vinyl alcohol) chains in a hydrated inorganic ionic liquid
Source: Royal Society of Chemistry journal article supplement (doi:10.1039/d0cp02679d), 2020-01-01
Supplement: d0cp02679d1.pdf [file d0cp02679d1.pdf]

## Supporting Information

### Solvation and Diffusion of Poly (vinyl alcohol) Chains in a Hydrated Inorganic Ionic Liquid

Parvin Karimineghlani,<sup>1</sup> Jin Zheng,<sup>2</sup> Yan-Yan Hu,<sup>2,3</sup> and Svetlana Sukhishvili<sup>1\*</sup>

**Gel permeation chromatography (GPC).** GPC was performed using a TOSOH GPC system equipped with refractive index and UV detectors at ambient temperature. A TSK-GEL Super MultiporePW-M column with a particle size of 5  $\mu\text{m}$  and different pore sizes was used for the characterization of 4  $\text{mg mL}^{-1}$  polymer solutions. Water was used as an eluent for the characterization of polymers. All solutions were eluted at a rate of 0.3  $\text{mL min}^{-1}$ , at ambient temperature.

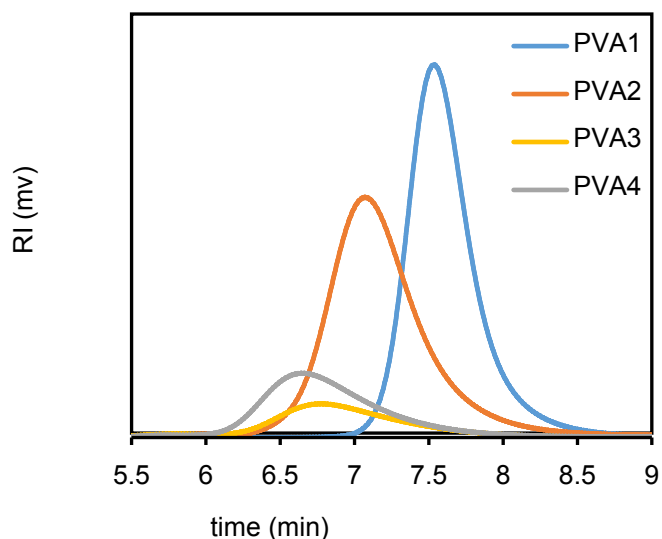

**Figure S1.** GPC traces of 4 mg/ml aqueous solutions of PVA with different molecular weights.

<sup>1</sup> Department of Materials Science and Engineering, Texas A&M University, College Station, 77843, TX USA

<sup>2</sup> Department of Chemistry & Biochemistry, Florida State University, Tallahassee, FL 32306, USA

<sup>3</sup> Center of Interdisciplinary Magnetic Resonance, National High Magnetic Field Laboratory, Tallahassee, FL 32310, USA

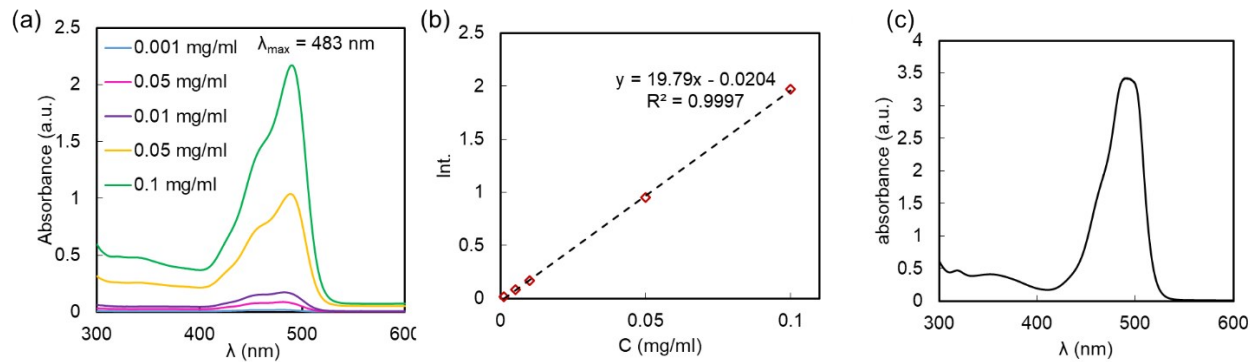

**Figure S2.** UV-vis calibration curves and determination of the labeling degree of PVA\* with FITC: (a) UV-vis absorbances of aqueous solutions of FITC of known concentrations (pH = 11); (b) the calibration curve for determining FITC concentration and (c) a UV-vis spectrum of 1 mg/ml aqueous solution of PVA3\* after extensive dialysis. Only PVA3\* results are shown here as an example.

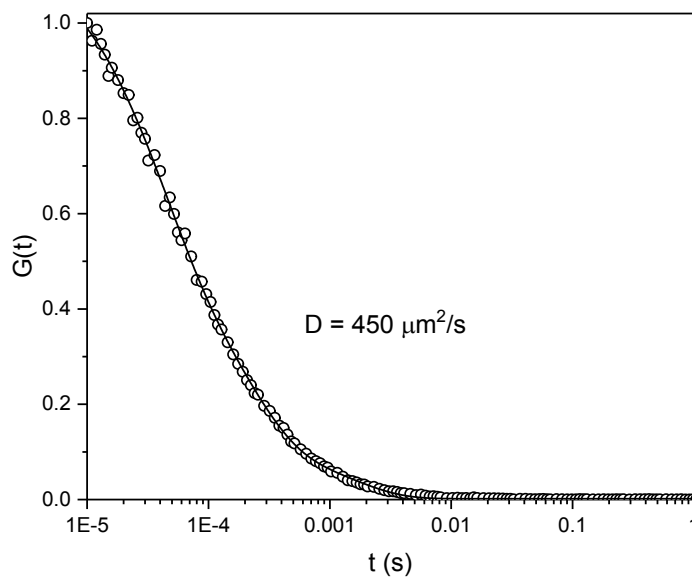

**Figure S3.** FCS autocorrelation function and diffusion coefficient of FITC in aqueous solutions used for calibration of the excitation volume of the FCS setup. Temperature was 22 °C.

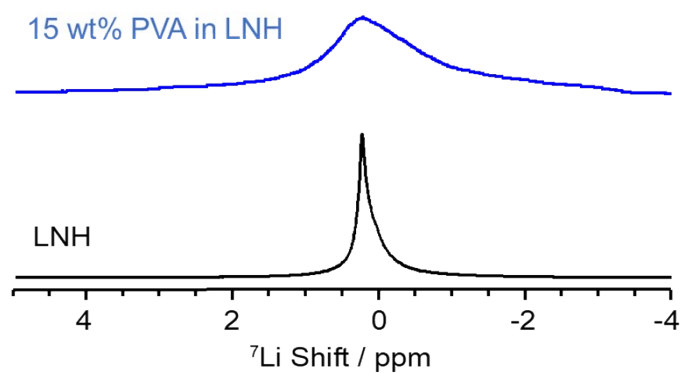

**Figure S4.**  $^7\text{Li}$  NMR spectra of a 15 wt% solution of PVA in LNH, along with the spectra of LNH solvent.

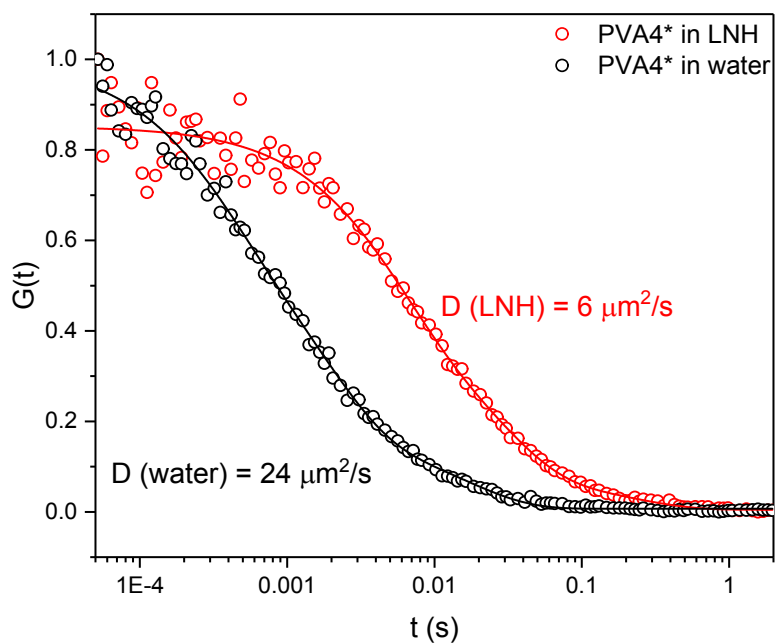

**Figure S5.** FCS autocorrelation functions and diffusion coefficients of  $10^{-4}$  mg/ml PVA4\* solutions in water and LNH. Temperature was 22 °C.

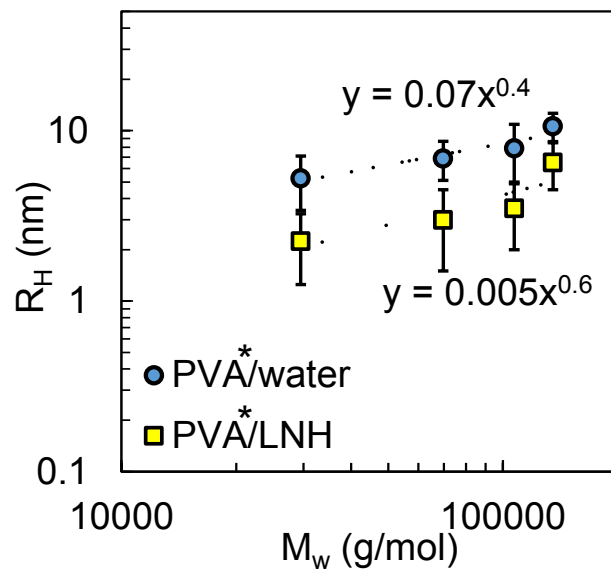

**Figure S6.** Molecular weight dependences of hydrodynamic radii of PVA\* measured in  $10^{-4}$  mg/ml aqueous or LNH solutions at 22 °C.

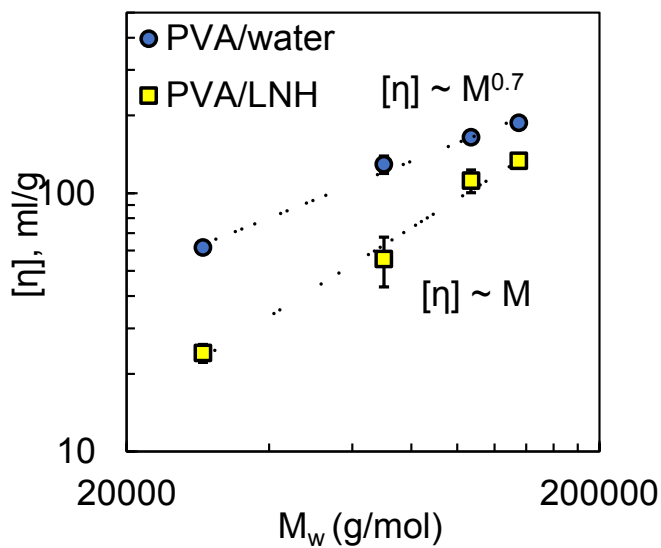

**Figure S7.** Molecular weight dependences of intrinsic viscosities of PVA in aqueous and LNH solutions at 35°C.

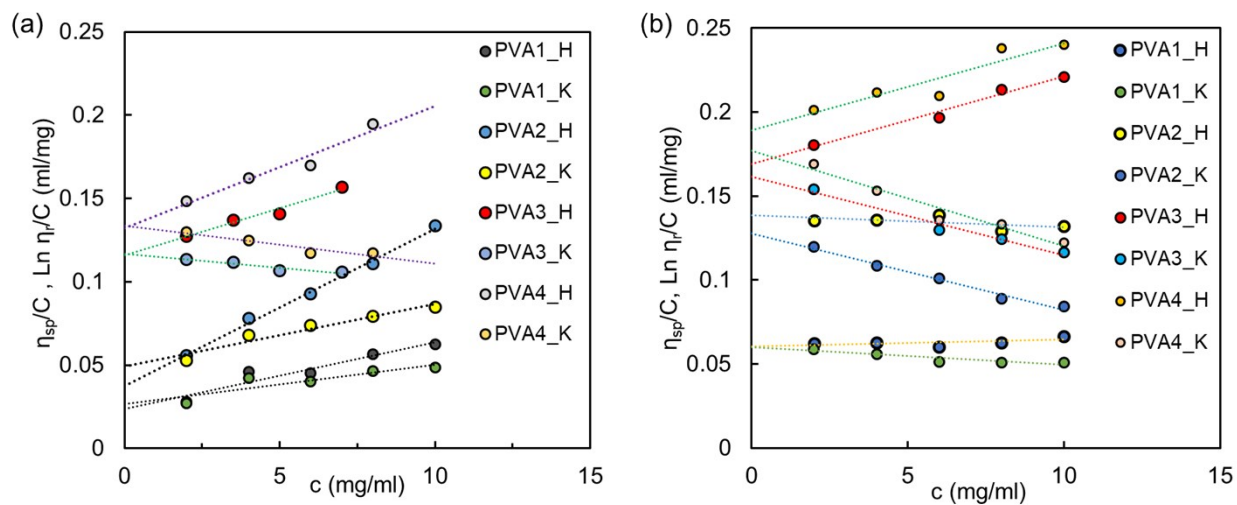

**Figure S8.** Intrinsic viscosity measurements for PVA in (a) LNH, and (b) aqueous solutions at a temperature of 35 °C. “H” and “K” refer to fitting using the Huggins and Kraemer equations, respectively.
